# Supplementary material for: Long term storage of miRNA at room and elevated temperatures in a silica sol–gel matrix
Source: Royal Society of Chemistry journal article supplement (doi:10.1039/d1ra04719a), 2021-01-01
Supplement: d1ra04719a1.pdf [file d1ra04719a1.pdf]

***Supporting Information for:***

Long term storage of miRNA at room and elevated temperatures in silica sol-gel matrix.

Rajat Chauhan <sup>a†</sup>, Theodore S. Kalbfleisch <sup>a</sup>, Chinmay S. Potnis <sup>b</sup>, Meenakshi Bansal <sup>c</sup>, Mark W. Linder <sup>d</sup>, Robert S. Keynton <sup>e\*</sup>, Gautam Gupta <sup>a\*</sup>

<sup>a</sup> Department of Chemical Engineering, University of Louisville, Louisville, Kentucky 40292, United States

<sup>b</sup> Department of Chemistry, University of Louisville, Louisville, Kentucky, 40292, United States

<sup>c</sup> Department of Chemistry, Thomas More University, Crestview Hills, KY, 41017.

<sup>d</sup> Department of Pathology and Laboratory Medicine, University of Louisville, Louisville, Kentucky 40292, United States

<sup>e</sup> William states Lee College of Engineering, University of North Carolina at charlotte, 28223, United States

\* Correspondence to: [gautam.gupta@louisville.edu](mailto:gautam.gupta@louisville.edu) and [robert.keynton@louisville.edu](mailto:robert.keynton@louisville.edu)

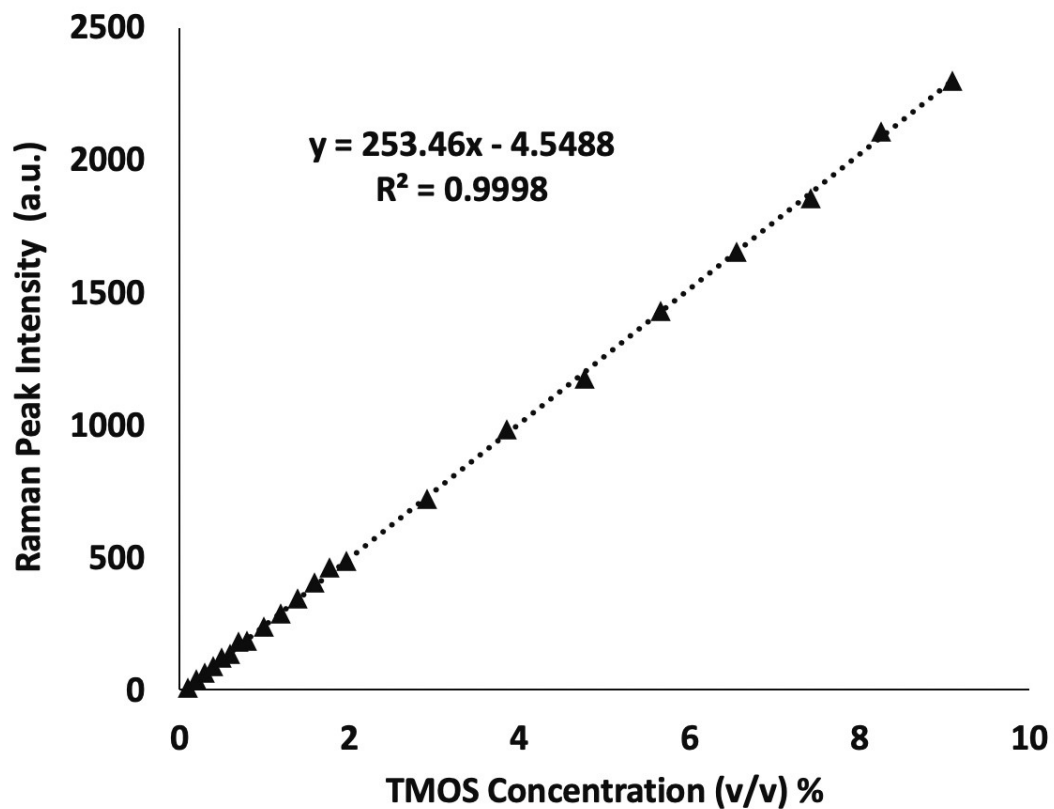

Figure. S1. Calibration Curve of Raman Peak Intensity Vs. TMOS Concentration (v/v) %: A significant increase in the raman peak intensities of methanol is demonstrated with the increase in TMOS concentrations in (0.5 - 10) v/v % range.

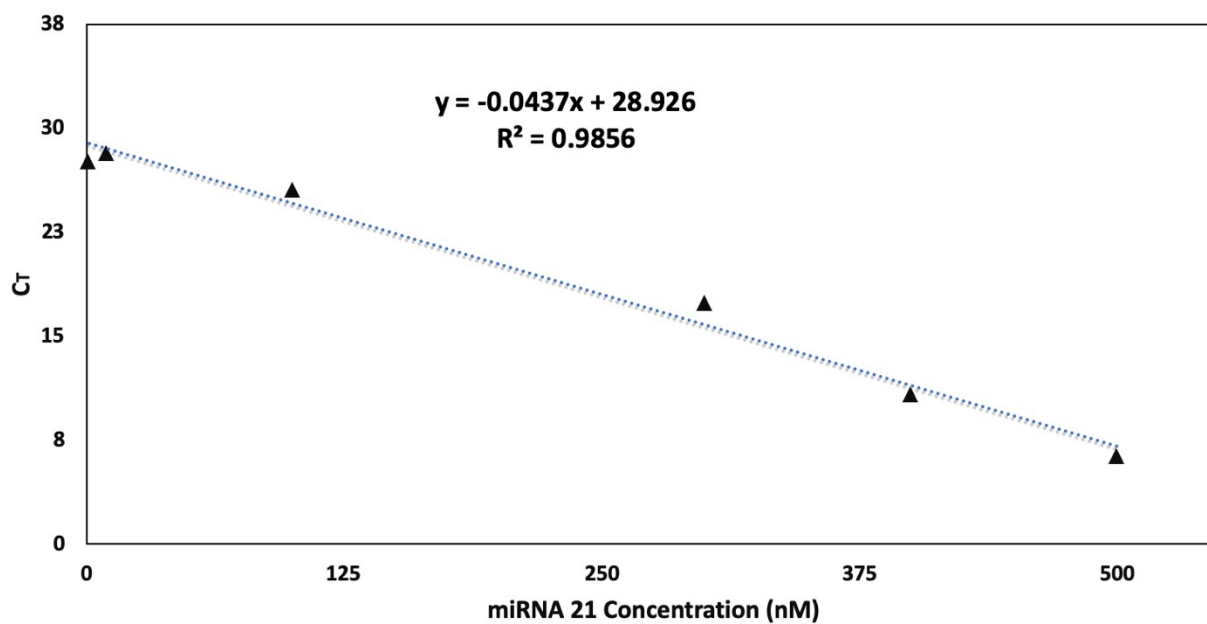

Figure. S2. miRNA 21 concentration (nM) calibration curve in CaRGOS using qRT-PCR analysis: Formulation parameters used were 0.5 v/v % CaRGOS, Low-salt Tris EDTA buffer and nuclease free water.

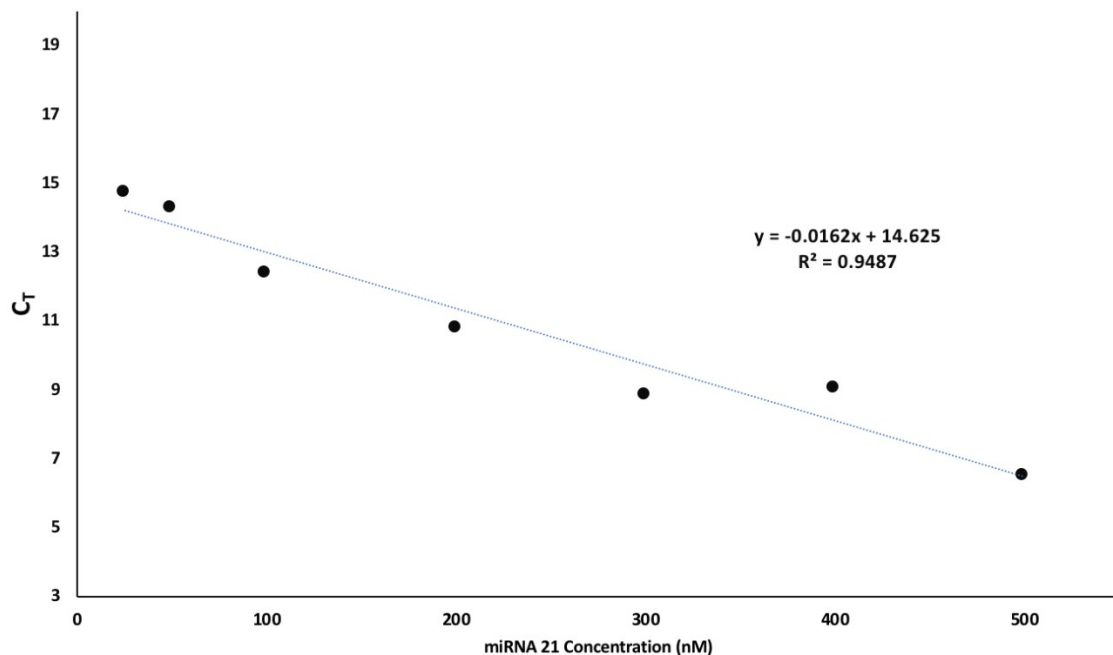

Figure.S3. miRNA 21 concentration (nM) calibration curve in nuclease free water using qRT-PCR analysis: Formulation parameters used were low-salt buffer and nuclease free water.

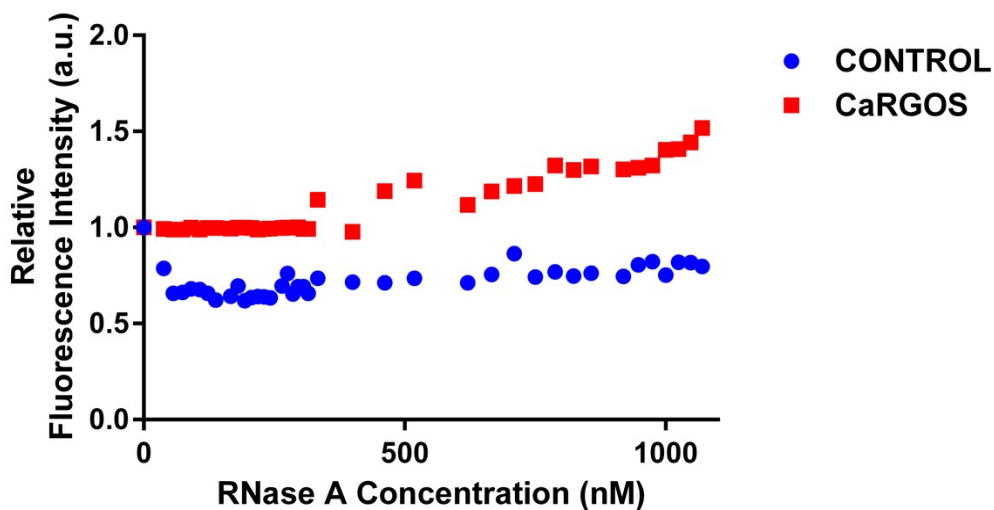

Figure. S4. A plot of relative fluorescence intensity of Ethidium bromide against RNase A concentrations in (0-1200) nM range: An increase in relative fluorescence emission intensities of EtBr was observed in (320-1200) nM RNase A concentrations range.

**Table S1**

---

**Theoretical and calculated molar methanol yield : Efficiency of the hydrolysis was computed utilizing the Raman peak of methanol aqueous solutions.**

---

|                                     |        |        |        |        |
|-------------------------------------|--------|--------|--------|--------|
| <b>TMOS (v/v %)</b>                 | 0.5    | 1.0    | 5      | 10     |
| <b>Theoretical Methanol (mol/L)</b> | 0.1353 | 0.2707 | 1.3533 | 2.7066 |
| <b>Calculated Methanol (mol/L)</b>  | 0.1311 | 0.2250 | 1.2519 | 2.5707 |
| <b>Hydrolysis Efficiency (%)</b>    | 98.4   | 83.1   | 92.5   | 95.0   |

---

**Table S2**

---

**Methanol content of hydrolyzed TMOS formulations : A significant increase in methanol concentrations is demonstrated with the increase in TMOS concentrations.**

---

| <b>TMOS (v/v %)</b> | <b>Methanol Peak (Counts)</b> | <b>Methanol Content (v/v %)</b> |
|---------------------|-------------------------------|---------------------------------|
| <b>0.5</b>          | 191.0                         | 0.74                            |
| <b>1.0</b>          | 235.3                         | 0.91                            |
| <b>5.0</b>          | 1288.2                        | 5.06                            |
| <b>10.0</b>         | 2640.4                        | 10.40                           |

---

**Table S3**

**Size and stability characterization of CaRGOS formulations : Hydrodynamic Size (DLS), Polydispersity Index (PDI) and Stability [zeta potential ( $\zeta$ )] characterization of CaRGOS.**

| <b>Sample</b>                                          | <b>DLS (nm)</b>  | <b>PDI</b>        | <b>Zeta Potential (mV)</b> |
|--------------------------------------------------------|------------------|-------------------|----------------------------|
| <b>CaRGOS without buffer (1.25 v/v %)</b>              | $*0.79 \pm 0.11$ | $0.983 \pm 0.026$ | $-22.07 \pm 1.01$          |
| <b>CaRGOS without buffer (0.5 v/v %)</b>               | **               | **                | $-26.58 \pm 7.69$          |
| <b>CaRGOS with Buffer (0.5 v/v %)</b>                  | $67.22 \pm 1.65$ | $0.248 \pm 0.006$ | $-10.50 \pm 1.66$          |
| <b>CaRGOS with Buffer (0.5 v/v %) and miRNA 21</b>     | $69.95 \pm 0.47$ | $0.308 \pm 0.004$ | $-20.04 \pm 1.26$          |
| <b>CaRGOS with Buffer (0.5 v/v %) without miRNA 21</b> | $70.02 \pm 2.09$ | $0.338 \pm 0.035$ | $-22.07 \pm 1.01$          |

*\*A (~1 nm) Hydrodynamic size is insignificant*

*\*\*Count-rate too low for measurement*

**Table S4:**

---

**Reverse Transcription (RT) reaction mixture for a 15  $\mu$ L reaction : 15  $\mu$ L reaction consists of 7  $\mu$ L master mix, 3  $\mu$ L of 5X primer and 5  $\mu$ L miRNA 21 sample (with or w/o CaRGOS).**

---

| <b>Component</b>                                                      | <b>Volume (<math>\mu</math>L) per 15- <math>\mu</math>L reaction</b> |
|-----------------------------------------------------------------------|----------------------------------------------------------------------|
| <b>100 mM dNTPs</b>                                                   | 0.15                                                                 |
| <b>MultiScribe Reverse Transcriptase, 50 U/<br/><math>\mu</math>L</b> | 1.00                                                                 |
| <b>10X Reverse Transcription Buffer</b>                               | 1.50                                                                 |
| <b>RNase Inhibitor 20 U/<math>\mu</math>L</b>                         | 0.19                                                                 |
| <b>Nuclease-free water</b>                                            | 4.16                                                                 |
| <b>5X miRNA</b>                                                       | <u>3.00</u>                                                          |
| <b>Total volume(<math>\mu</math>L)</b>                                | 10.00                                                                |

---

**Table S5**

---

**PCR reaction mixture for a 10  $\mu$ L reaction: Each 10  $\mu$ L reaction consists of 5  $\mu$ L master mix, 0.5  $\mu$ L of 20X primer, 3.17 $\mu$ L of nuclease-free water and 1.33 $\mu$ L of cDNA (RT product).**

---

| <b>Component</b>            | <b>Volume (<math>\mu</math>L) per 10- <math>\mu</math>L reaction</b> |
|-----------------------------|----------------------------------------------------------------------|
| <b>20X miRNA Primer</b>     | 0.5                                                                  |
| <b>Universal Master Mix</b> | 5.00                                                                 |
| <b>Nuclease-free water</b>  | <u>3.17</u>                                                          |
| <b>Total Volume</b>         | 8.67                                                                 |

---
